# Supplementary material for: Stem cell–nanomedicine system as a theranostic bio-gadolinium agent for targeted neutron capture cancer therapy
Source: PubMed Central journal article supplement (PMC9845336; doi:10.1038/s41467-023-35935-0), 2023-01-18
Supplement: 41467_2023_35935_MOESM1_ESM.pdf [file 41467_2023_35935_MOESM1_ESM.pdf]

## Supplementary Information

**Table S1.** Encapsulation efficiency (%) and loading capacity (%) of Gd in various Fu-based nanoparticle formulations.

|          | Loaded Gd content (mg) | Encapsulation Efficiency (%) | Loading capacity (%) |
|----------|------------------------|------------------------------|----------------------|
| Gd-FFNP  | 13.70                  | 48.93                        | 38.14                |
| Gd-PPNP  | 15.47                  | 55.27                        | 18.78                |
| Gd-FPFNP | 16.69                  | 59.64                        | 28.57                |

**Table S2.** Semi-quantitative characterization of the distribution of Gd-FPFNP at the tumors by Prussian blue staining for different treatment conditions.

|                    | Gd-FPFNP | Gd-FPFNP+MN | SNS+MN |
|--------------------|----------|-------------|--------|
| Score <sup>a</sup> | 1        | 1-2         | 3      |

<sup>a</sup> Perls' Prussian blue stained samples were graded semiquantitatively as follows: 0= no iron; 1=minimal or small amount; 2=slight and patchy; 3=moderate and diffuse; 4=strong, extensive, and diffuse content.

**Table S3.** A brief literature overview of Gd-containing nanomedicines or Gd-compounds used in NCT treatment for different types of tumors. The injected dose in mice has been converted to the same unit in rat for comparison.<sup>1</sup>

| Gd formulation              | Model                        | Dose (Gd-compound)                  | Translated Gd dose in rat (mg kg <sup>-1</sup> ) | Ref       |
|-----------------------------|------------------------------|-------------------------------------|--------------------------------------------------|-----------|
| Free gadobutrol             | Subcutaneous melanoma/ mice  | 18.14 mg (Gadobutrol) for 25 g mice | ≈94.33                                           | 2         |
| Gd-DTPA-loaded chitosan NPs | Subcutaneous melanoma/ mice  | 2.4 mg (Gd-DTPA) for 25 g mice      | ≈3.44                                            | 3         |
| Gd-DTPA/CaP NPs             | Subcutaneous C26 tumor/ mice | 206.25 μg (Gd-DTPA) for 25 g mice   | ≈1.15                                            | 4         |
| SNS                         | Orthotopic GBM/ rat          | 109.3 μg (Gadodiamide)              | 0.2                                              | This work |

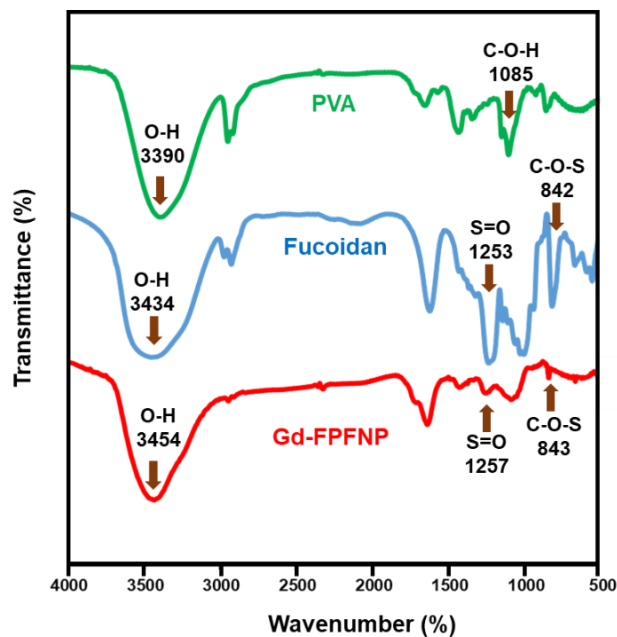

17  
18 **Figure S1.** Fourier transform infrared (FTIR) spectra of PVA, fucoidan, and Gd-PPFNP.  
19

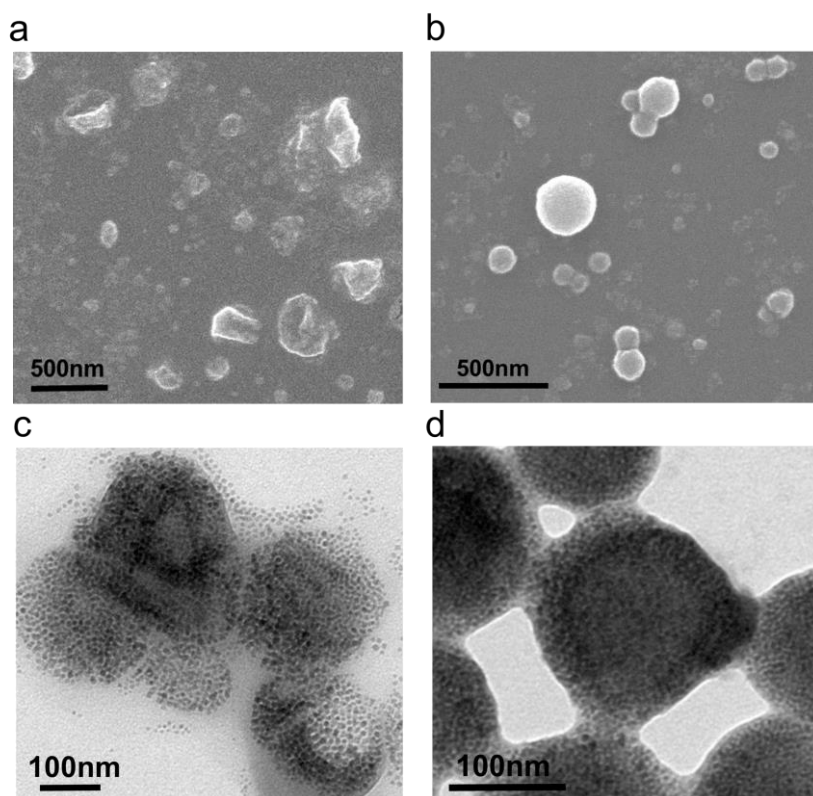

20  
21 **Figure S2.** SEM image of a) Gd-FFNP and b) Gd-PPNP. TEM image of c) Gd-FFNP and d) Gd-  
22 PPNP. As fucoidan lacks amphipathic properties to stabilize the W/O interface, the Gd-FFNPs  
23 were not structurally stable and non-spherical nanostructures could be observed under electron  
24 microscopy (**Figure S2a, c**). In contrast, Gd-PPNP presented spherical and homogeneous  
25 structures (**Figure S2b and d**), attributed to the amphiphilic properties of PVA.

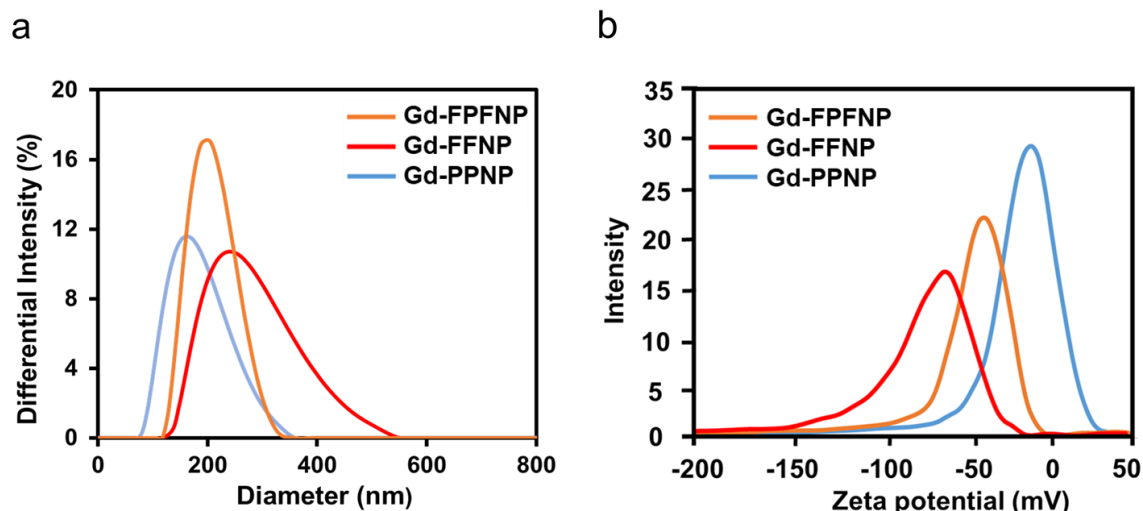

26  
 27 **Figure S3.** a) Size distributions of all nanoparticles measured using DLS. b) Zeta potentials of  
 28 FFNP (red), FPFNP (orange), and PPNP (blue) were measured using DLS.  
 29

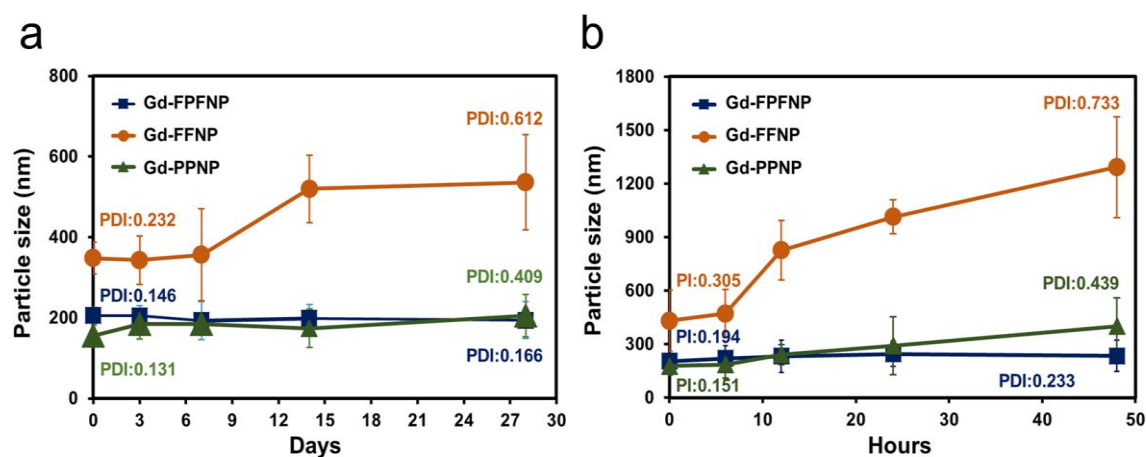

30  
 31 **Figure S4.** Stability of Gd-FPFNP, Gd-PPNP, and Gd-FFNP nanoparticles. The particles were  
 32 suspended in a) PBS for 4 weeks or b) PBS with 10% fetal bovine serum (FBS) for 48 h. The  
 33 results were expressed as mean  $\pm$  SD,  $n = 3$  independent nanoparticles. The size of Gd-FFNP  
 34 substantially increased with time and became polydisperse at day 28 in both solutions. Although  
 35 Gd-FPFNP and Gd-PPNP sustained colloidal stability in both solutions with minimal size change  
 36 in the first 2 weeks, only Gd-FPFNP maintained a monodispersed condition at day 28 in both  
 37 solutions.  
 38  
 39

a

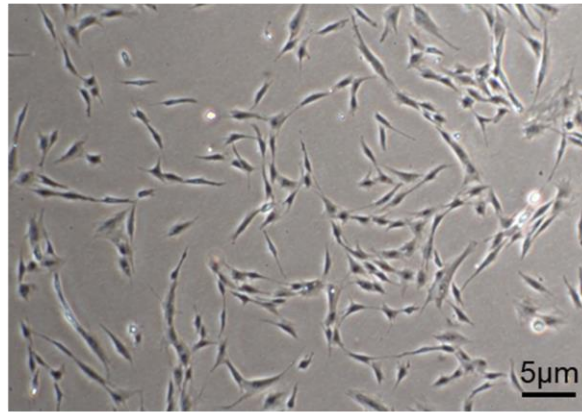

b

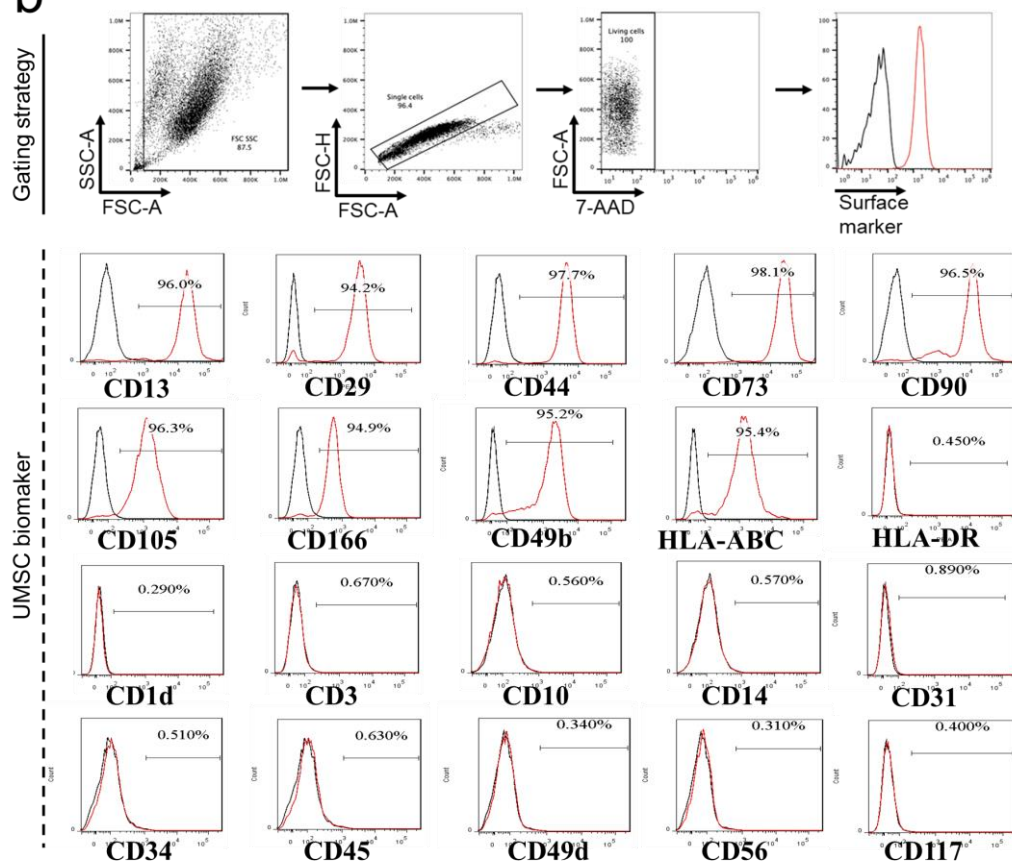

40 **Figure S5.** a) Cell morphology and b) biological properties of UMSCs. The UMSCs showed  
 41 negative expression for CD1d, CD3, CD10, CD14, CD31, CD34, CD45, CD49d, CD56, CD117,  
 42 and HLA-DR. In contrast, the surface markers of CD13, CD29, CD44, CD73, CD90, CD105,  
 43 CD166, CD49b, and HLA-ABC were positive.  
 44  
 45  
 46

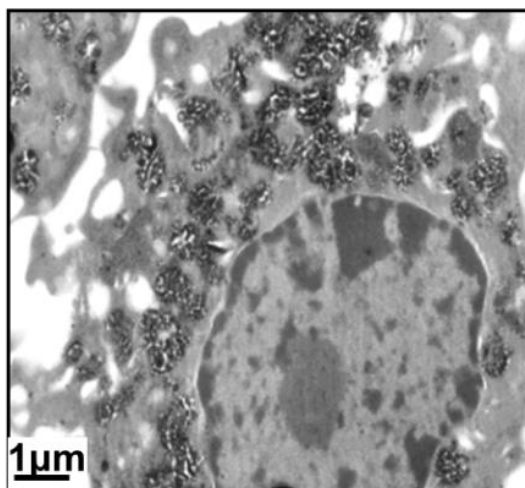

47  
48  
49

**Figure S6.** TEM image of Gd-FPFNP-treated UMSC (SNS).

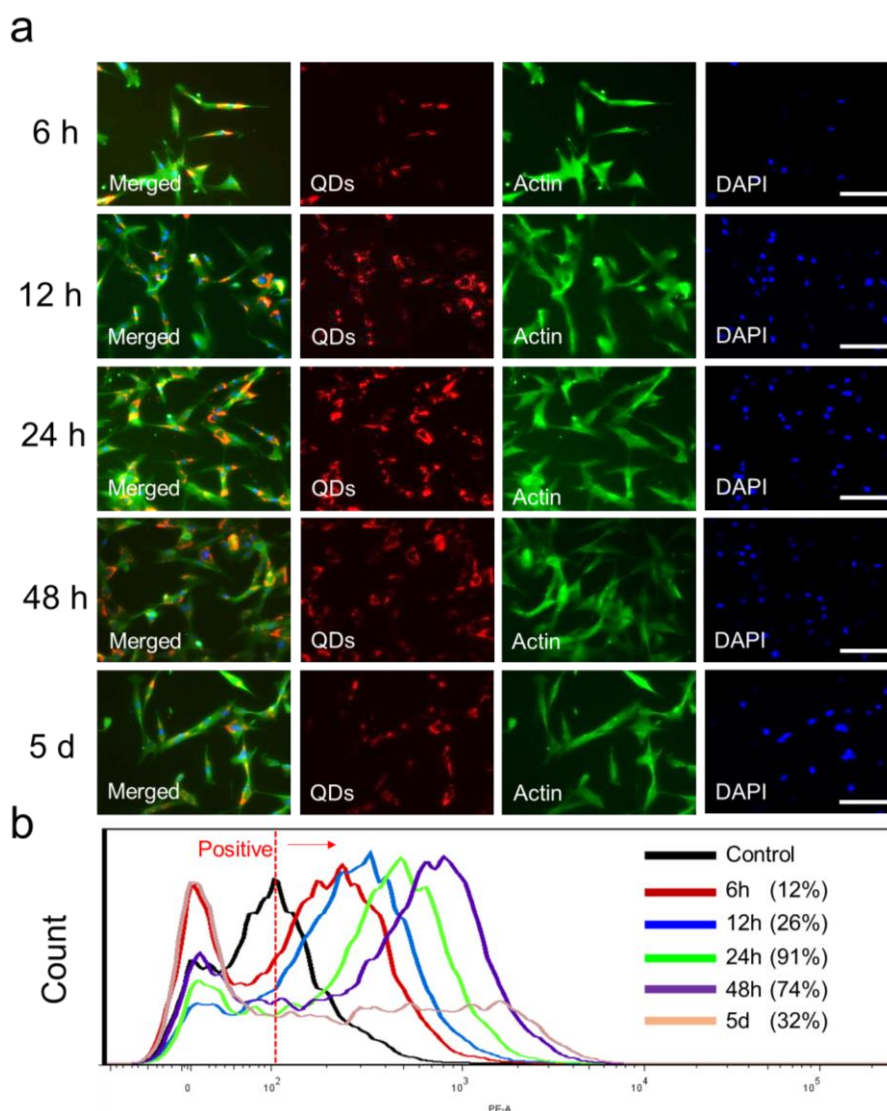

50  
51  
52  
53  
54

**Figure S7.** a) Cell uptake of UMSCs incubated with Gd-FPFNP for 6 h, 12 h, 24 h, 48 h, and 5 d, where the blue spots are the nuclei of the UMSC cells, the green fluorescence is cytoskeleton, and red indicates QD-labeled Gd-FPFNP. Scale bar = 20  $\mu$ m. b) Flow cytometric analysis of cell uptake efficiency for UMSCs incubated with Gd-FPFNP for 6 h, 12 h, 24 h, 48 h, and 5 d.

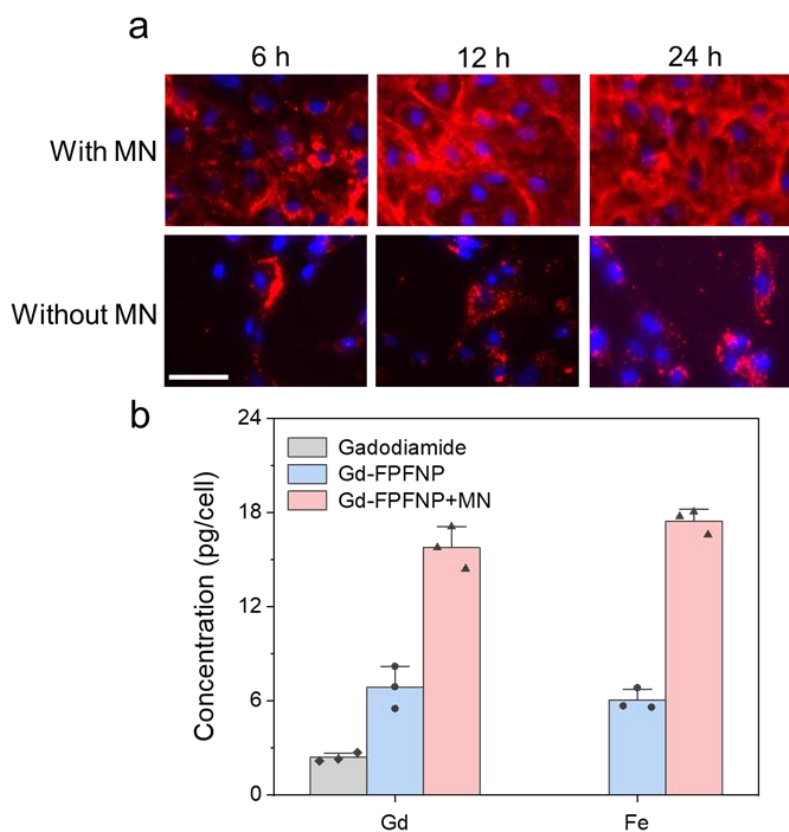

55  
 56 **Figure S8. Cell uptake behavior.** a) Uptake of UMSCs incubated with Gd-FPFNP with or without  
 57 MN or 6 h, 12 h, and 24 h where the blue spots are the nuclei of the UMSC cells and red indicates  
 58 QD-labeled Gd-FPFNP. Scale bar = 10  $\mu$ m.  $n = 3$  biologically independent UMSC samples with  
 59 the images are representative of 3 images with similar results. b) Gd and Fe concentration of free  
 60 gadodiamide and Gd-FPFNP after cell uptake for 12 h where free gadodiamide contains no Fe.  
 61 Data were analyzed by ICP-MS. The results were expressed as mean  $\pm$  SD,  $n = 3$  biologically  
 62 independent UMSC samples.  
 63



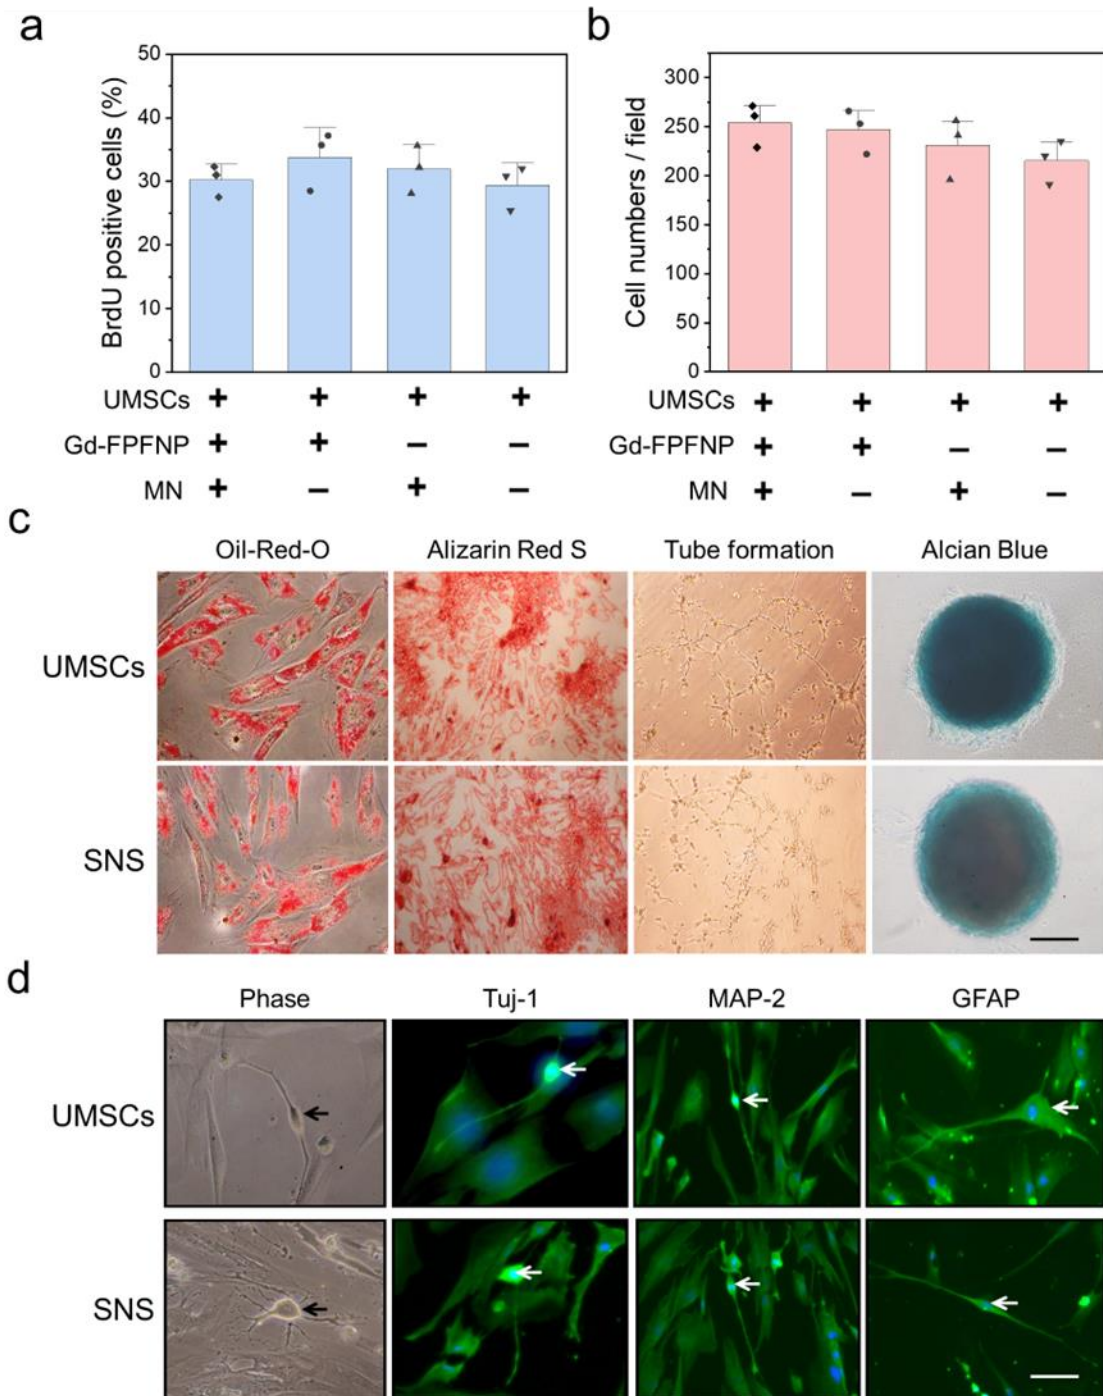

64  
 65 **Figure S9. Functional assessment of UMSCs with Gd-FPFNP.** Analysis of a) proliferation and  
 66 b) migration ability of UMSCs under different conditions. c) Adipogenic, chondrogenic, vascular  
 67 tube formation and osteogenic differentiation ability of UMSCs and SNS. d) Neuroglial cell  
 68 differentiation of UMSCs and SNS. For c) and d) scale bar = 50  $\mu$ m. For a) and b), the results were  
 69 expressed as mean  $\pm$  SD, n = 3 biologically independent UMSC samples.

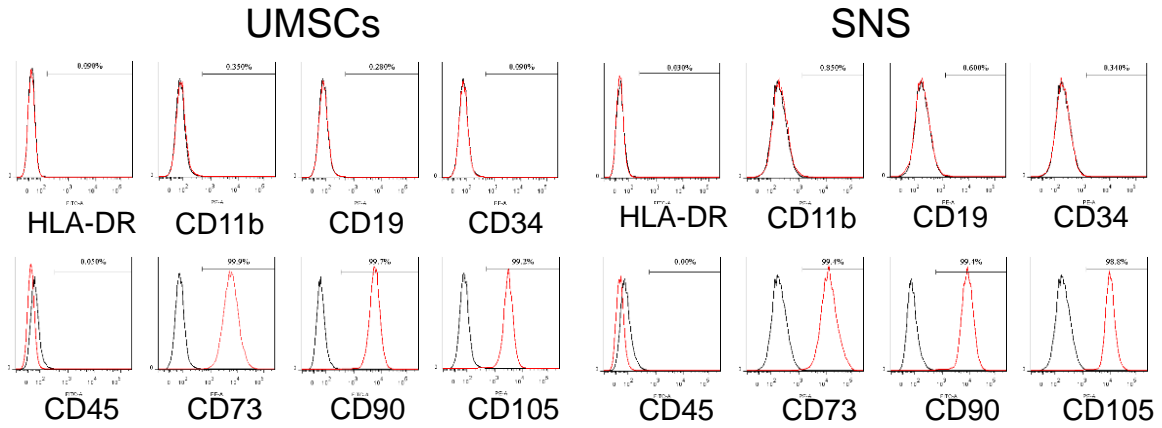

**Figure S10.** The surface biomarkers of UMSCs and SNS (Gd-FPFNP-treated UMSC).

70  
71  
72

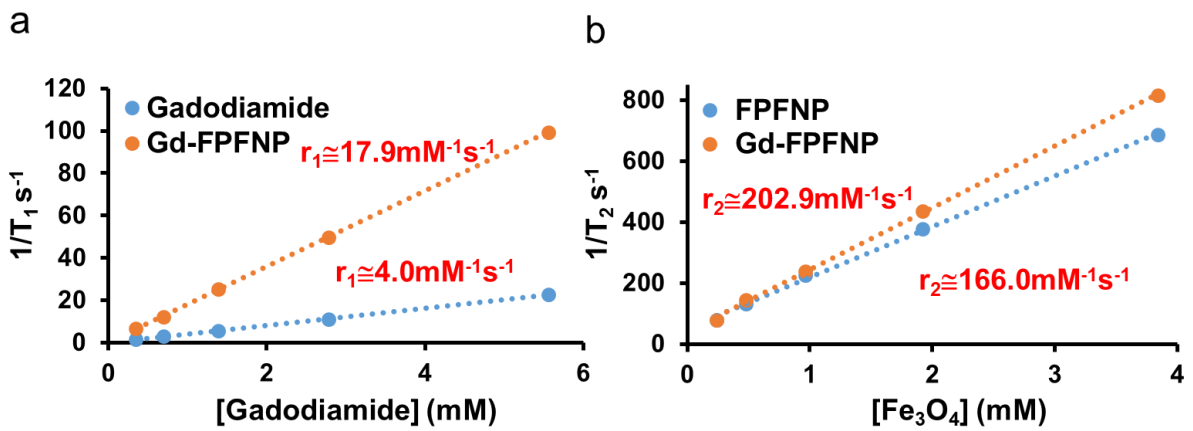

**Figure S11.** a) MR relaxation rate ( $r_1$ ) of gadodiamide and Gd-FPFNP at different Gd concentrations. b) MRI relaxation rate ( $r_2$ ) of FPFNP and Gd-FPFNP at different Fe<sub>3</sub>O<sub>4</sub> concentrations.

73  
74  
75  
76  
77  
78  
79

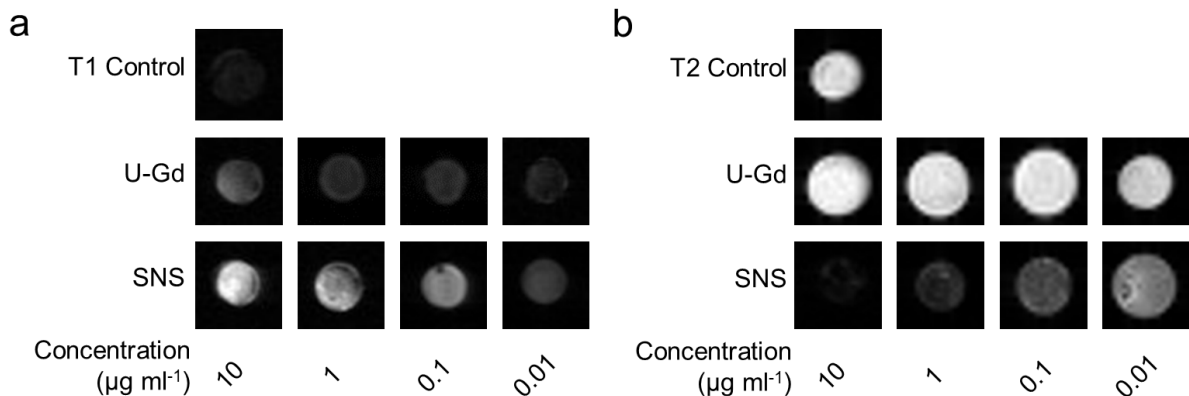

**Figure S12.** 7-T MRI a) T1 image and b) T2 image of control (agar), gadodiamide plus UMSCs (U-Gd), and SNS.

80  
81  
82  
83  
84  
85



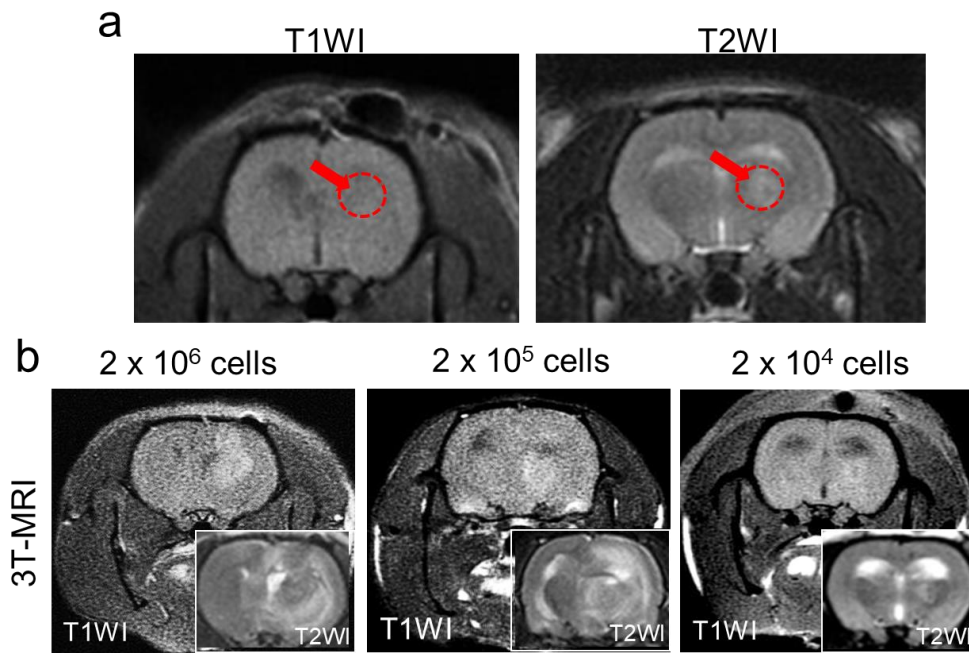

86  
87 **Figure S13.** 3T-MRI images of a) pre-contrast rat and b) rats treated with different doses of SNS  
88 via intracarotid injection.  
89

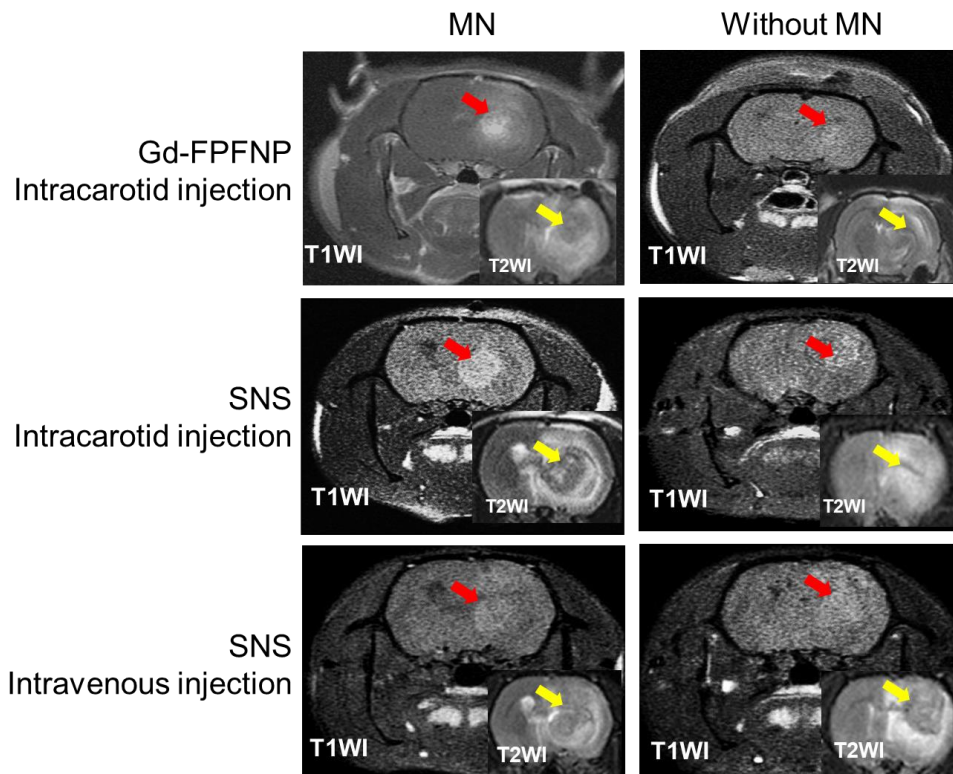

90  
91 **Figure S14. MRI tracking ability.** MRI images of F98-Luc rats treated with Gd-FPFNP  
92 with/without MN or SNS with/without MN via intracarotid injection, and with SNS with/without  
93 MN via intravenous injection.  
94  
95

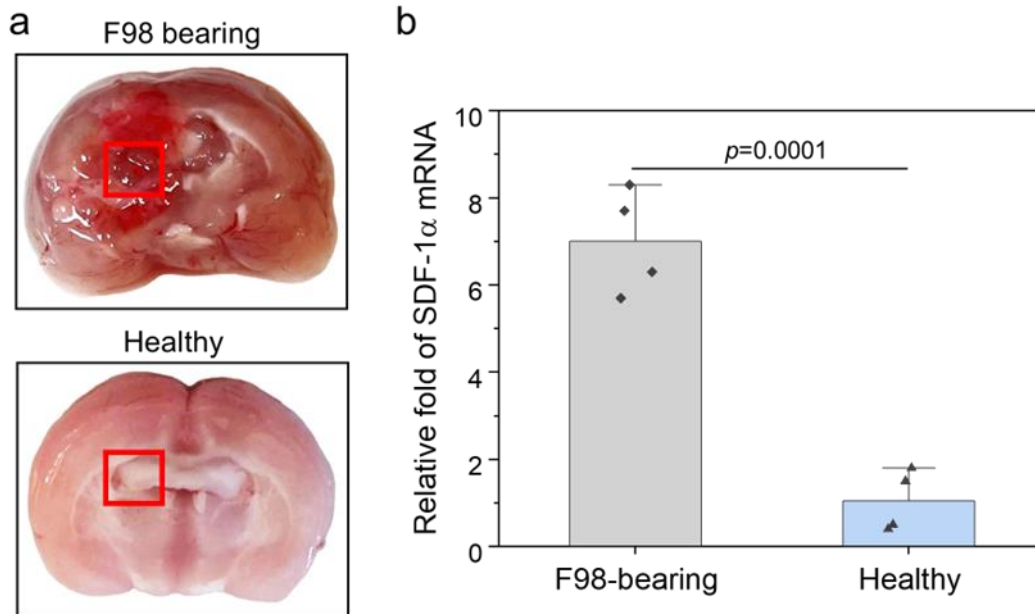

96  
 97 **Figure S15. SDF-1 measurement in the brains of tumor-bearing and healthy rats.** a) Brain  
 98 coronal view from rostral to caudal region. The images are representative to 4 images with similar  
 99 results. b) The mRNA level of SDF-1 $\alpha$ . The results were expressed as mean  $\pm$  SD,  $n = 4$  rats.  
 100 Statistical analysis was performed using two-sided t-test. For b) the p value of F98-bearing rats to  
 101 healthy rats is 0.0001.

102  
 103  
 104

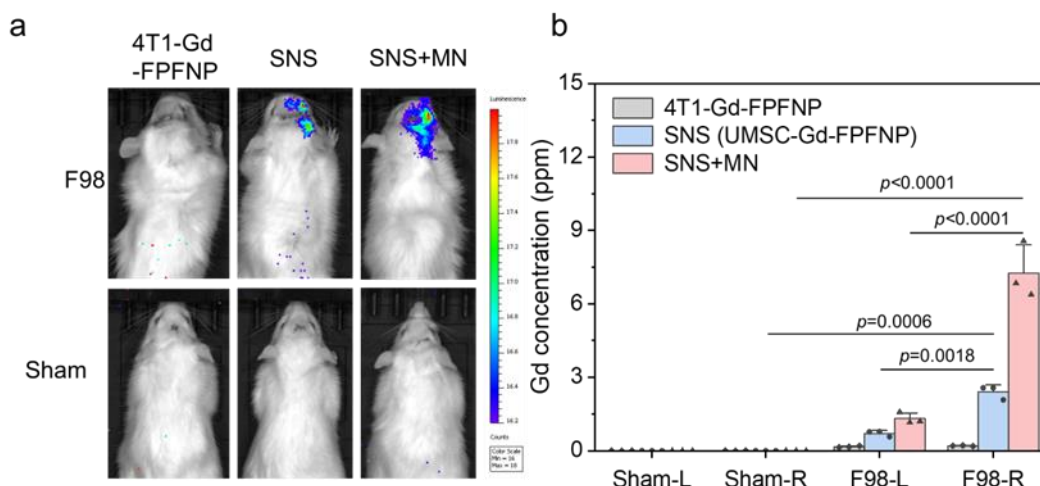

105  
 106 **Figure S16.** a) The IVIS image of F98-bearing rats and sham rats treated with 4T1-Gd-FPFNP,  
 107 SNS, or SNS+MN. b) Quantification of the Gd content for the left (L) and right (R) brains of F98-  
 108 bearing rats and sham rats treated with 4T1-Gd-FPFNP, SNS, or SNS+MN using ICP-MS. Sham-  
 109 L: left brain of the sham group; Sham-R: right brain of the sham group; F98-L: left brain of the  
 110 F98-bearing rats; F98-R: right brain of the F98-bearing rats. The results were expressed as mean  $\pm$   
 111 SD,  $n = 3$  rats. Statistical analysis was performed by Graph Pad Prism 9.0 Software: one-way  
 112 ANOVA with Tukey's multiple comparisons test. For b), the p value of SNS between F98-L and  
 113 F98-R is 0.0018, SNS plus MN between F98-L and F98-R is  $< 0.0001$ , SNS between F98-R and  
 114 Sham-R is 0.0006, and SNS plus MN between F98-R and Sham-R is  $< 0.0001$ .

115  
 116

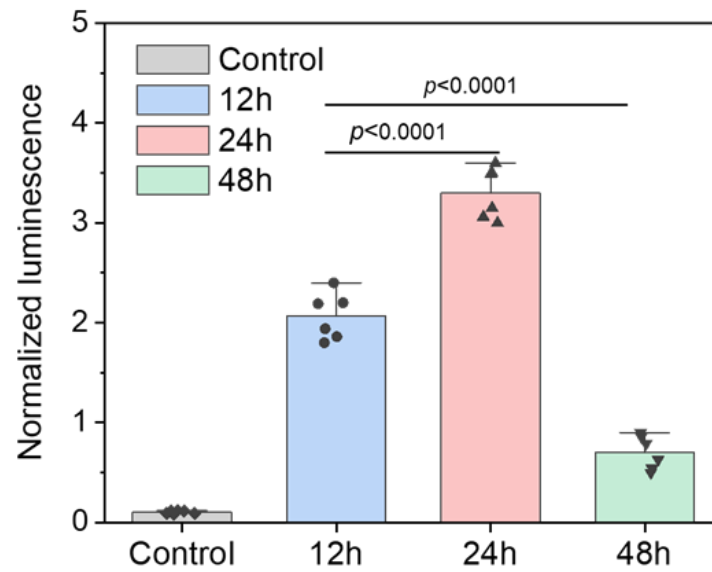

118  
 119 **Figure S17.** Semi-quantitative data of IVIS in **Figure 3**. The results were expressed as mean  $\pm$  SD,  
 120  $n = 6$  rats. Statistical analysis was performed by Graph Pad Prism 9.0 Software: one-way ANOVA  
 121 with Tukey's multiple comparisons test. The p values of 12h to 24h and 48h are both less than  
 122 0.0001.

123  
 124  
 125

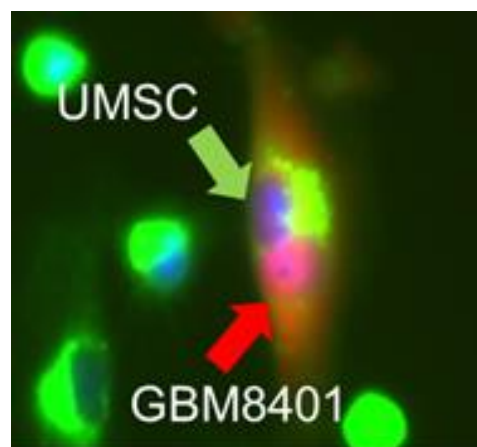

126  
 127 **Figure S18.** Cell fusion of UMSCs and GBM cells (one cell with two nuclei) after 24 h incubation.  
 128  
 129

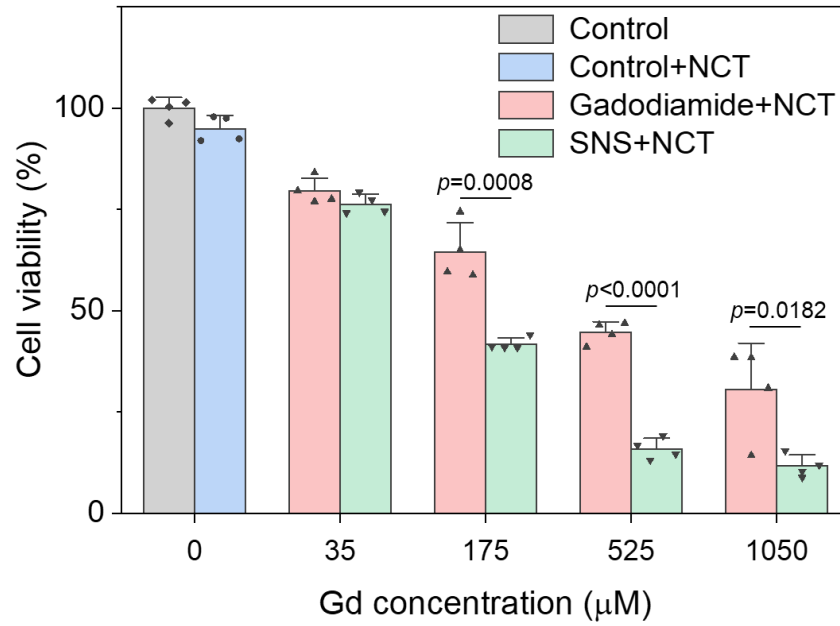

130  
 131 **Figure S19.** *In vitro* cell viability of GBM8401 (GBM) cells co-cultured with free gadodiamide or  
 132 SNS under different concentrations of gadodiamide at 24 h post NCT. The results were expressed  
 133 as mean  $\pm$  SD,  $n = 4$  independent GBM cells. Statistical analysis was performed using two-sided t-  
 134 test versus free gadodiamide. The p values of SNS plus NCT to gadodiamide plus NCT at Gd  
 135 concentration of 175, 525, and 1050  $\mu$ M are 0.0008,  $< 0.0001$ , and 0.0182, respectively.  
 136

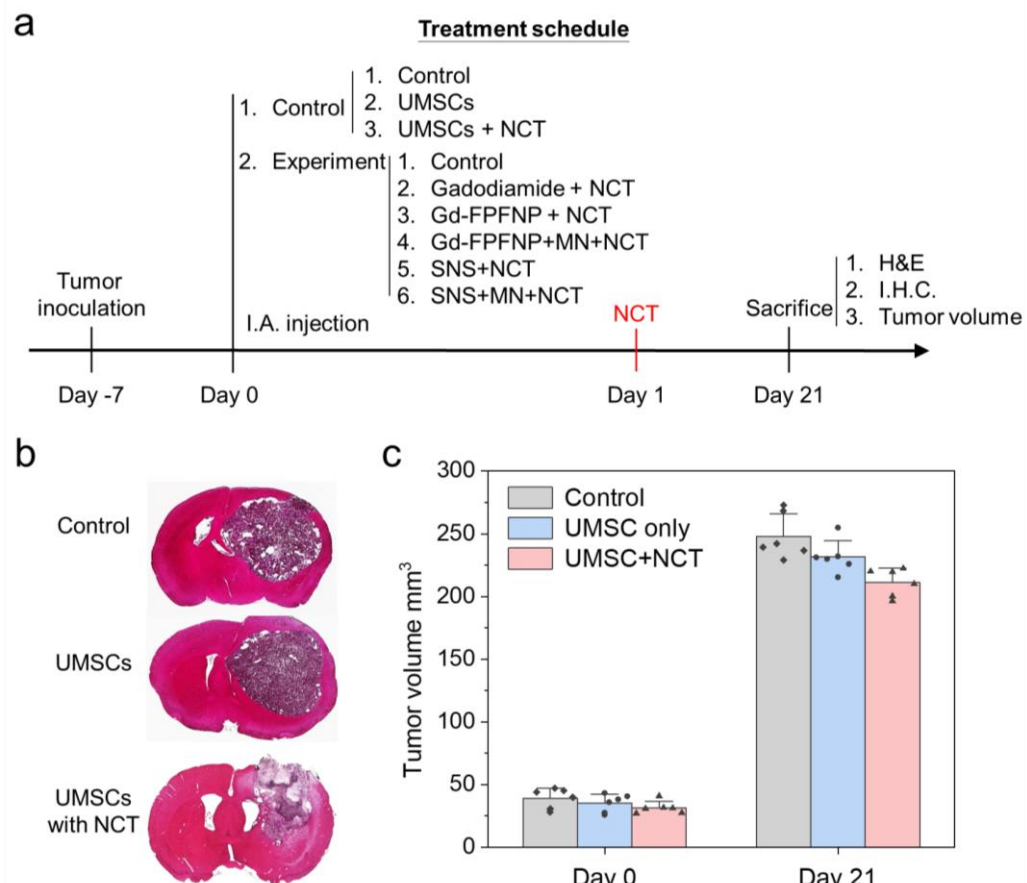

137  
 138 **Figure S20. Tumor size after NCT treatment.** a) Treatment schedule in our study. b) H&E  
 139 staining of tumor at 21 days after indicated treatment. c) Tumor volumes at Day 0 (before treatment)  
 140 and Day 21 (post treatment). The results were expressed as mean  $\pm$  SD,  $n = 6$  rats.  
 141

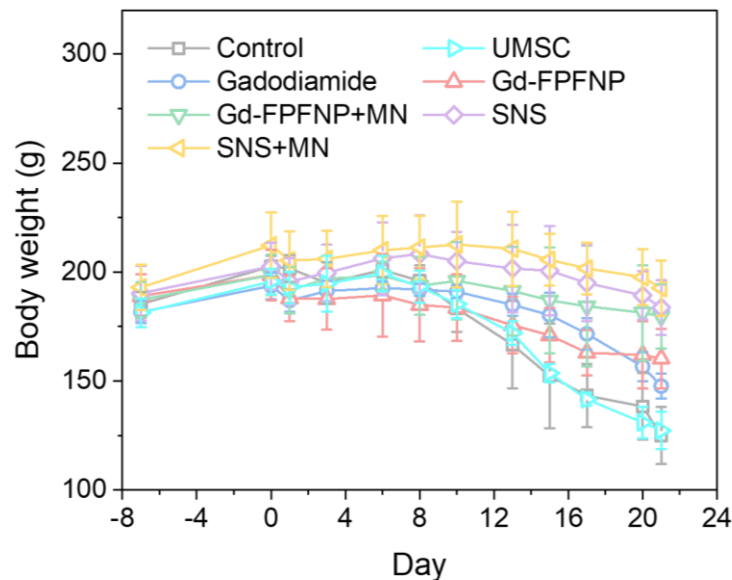

142  
 143 **Figure S21. Monitoring of the body weight for the F98-bearing rats treated with saline (control),**  
 144 **UMSC, Gadodiamide, Gd-FPFNP, Gd-FPFNP+MN, SNS and SNS+MN plus NCT.** The treatment  
 145 started from Day 0 and the NCT was performed at day 1 (see treatment course plan in Figure S20).  
 146 The results were expressed as mean  $\pm$  SD,  $n = 6$  rats.  
 147



a

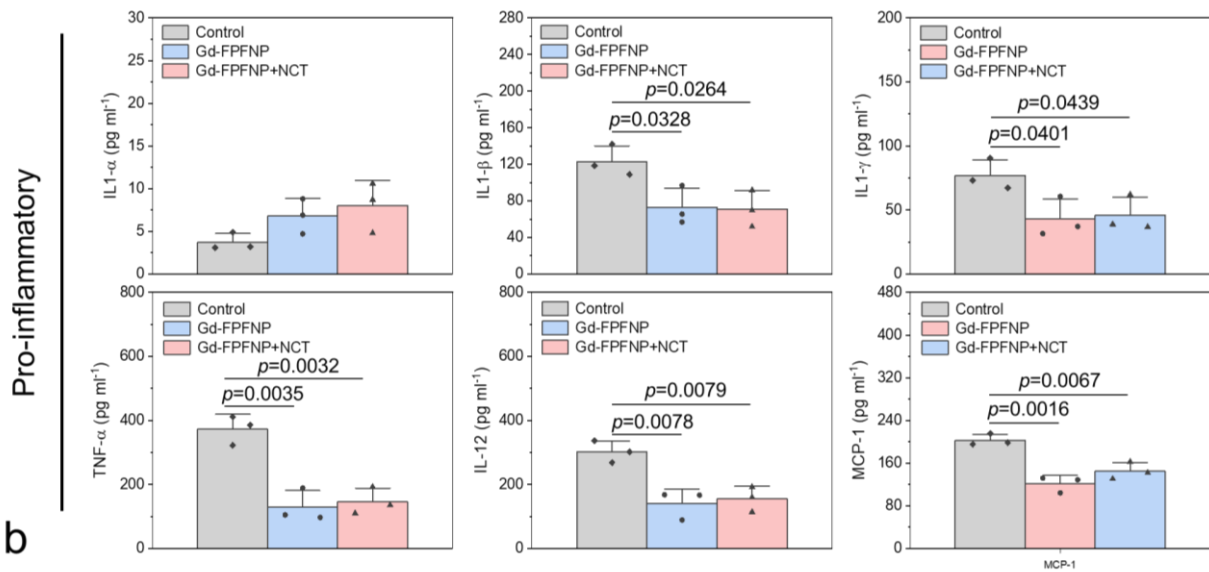

b

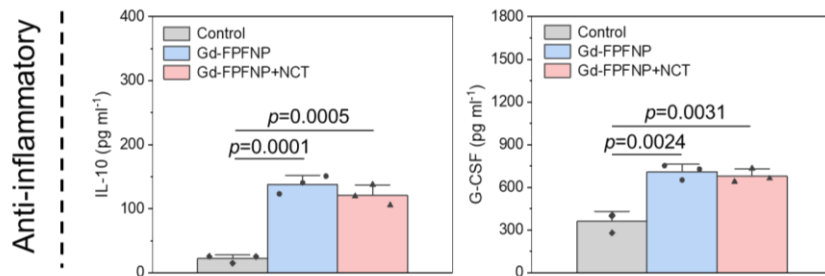

148  
 149 **Figure S22. Anti-inflammatory and neuroprotective ability of fucoidan-based nanoparticles.**  
 150 Fucoidan-based nanoparticles mediated immunomodulation-induced neuroprotection in rats  
 151 bearing GBM. Gd-FPFNP induced a significant reduction in proinflammatory factors in serum: a)  
 152 IL-1 $\alpha$ , IL-1 $\beta$ , IFN- $\gamma$ , TNF- $\alpha$ , IL-12, MCP-1 and enhancement of anti-inflammatory cytokines: b)  
 153 IL-10 and G-CSF at 24 h or 48 h after treatment compared to saline control groups. The results are  
 154 expressed as mean  $\pm$  SD., n= 3 rats. Statistical analysis was performed by Graph Pad Prism 9.0  
 155 Software; two-sided t-test compared with saline-control. The p values between control and Gd-  
 156 FPFNP and Gd-FPFNP plus NCT are 0.0328 and 0.0264 (IL-1 $\beta$ ), 0.0401 and 0.0439 (IFN- $\gamma$ ),  
 157 0.0035 and 0.0032 (TNF- $\alpha$ ), 0.0078 and 0.0079 (IL-12), 0.0016 and 0.0067 (MCP-1), 0.0001 and  
 158 0.0005 (IL-10), 0.0024 and 0.0031 (G-CSF), respectively.

159  
 160  
 161

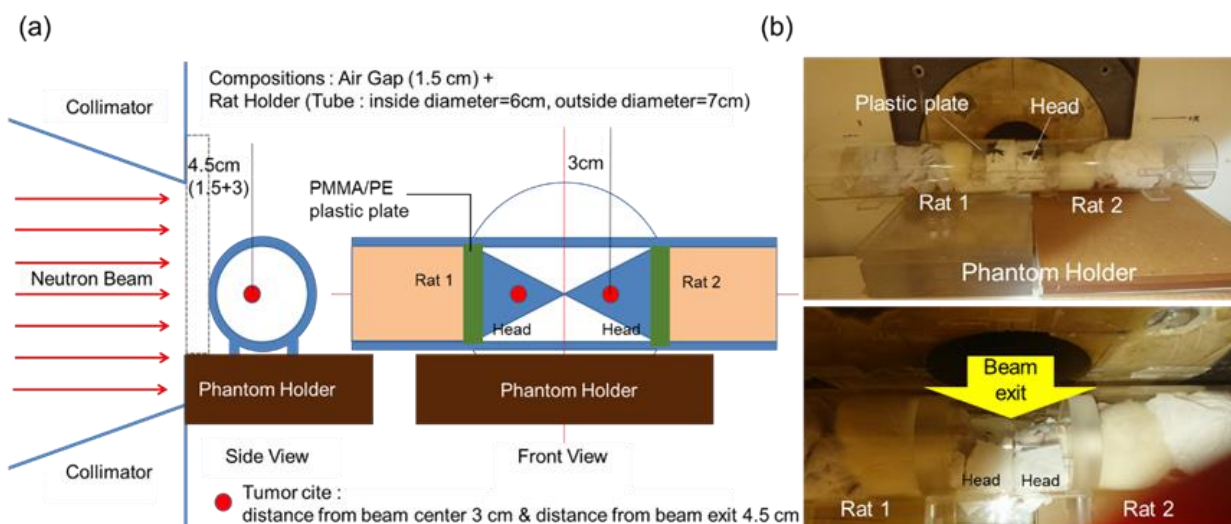

162  
 163 **Figure S23.** a) Schematic illustration of the relative position of rat holder, rat, tumor site, and the  
 164 beam exit. b) Representative real image of the relative position of rat holder, rat, tumor site, and  
 165 the beam exit.

166  
 167  
 168 **References**

- 169 1. Nair AB, Jacob S. A simple practice guide for dose conversion between animals and  
 170 human. *J Basic Clin Pharm* **7**, 27-31 (2016).  
 171  
 172 2. Hofmann B, Fischer CO, Lawaczeck R, Platzek J, Semmler W. Gadolinium neutron  
 173 capture therapy (GdNCT) of melanoma cells and solid tumors with the magnetic  
 174 resonance imaging contrast agent Gadobutrol. *Investigative radiology* **34**, 126-133  
 175 (1999).  
 176  
 177 3. Tokumitsu H, Hiratsuka J, Sakurai Y, Kobayashi T, Ichikawa H, Fukumori Y.  
 178 Gadolinium neutron-capture therapy using novel gadopentetic acid-chitosan complex  
 179 nanoparticles: in vivo growth suppression of experimental melanoma solid tumor. *Cancer*  
 180 *letters* **150**, 177-182 (2000).  
 181  
 182 4. Mi P, *et al.* Hybrid Calcium Phosphate-Polymeric Micelles Incorporating Gadolinium  
 183 Chelates for Imaging-Guided Gadolinium Neutron Capture Tumor Therapy. *ACS Nano* **9**,  
 184 5913-5921 (2015).
