# Supplementary material for: Stem cell–nanomedicine system as a theranostic bio-gadolinium agent for targeted neutron capture cancer therapy
Source: PubMed Central journal article supplement (PMC9845336; doi:10.1038/s41467-023-35935-0), 2023-01-18
Supplement: 41467_2023_35935_MOESM2_ESM.pdf [file 41467_2023_35935_MOESM2_ESM.pdf]

## Reporting Summary

Nature Portfolio wishes to improve the reproducibility of the work that we publish. This form provides structure for consistency and transparency in reporting. For further information on Nature Portfolio policies, see our [Editorial Policies](#) and the [Editorial Policy Checklist](#).

### Statistics

For all statistical analyses, confirm that the following items are present in the figure legend, table legend, main text, or Methods section.

- |                                     |                                                                                                                                                                                                                                                                                                |
|-------------------------------------|------------------------------------------------------------------------------------------------------------------------------------------------------------------------------------------------------------------------------------------------------------------------------------------------|
| n/a                                 | Confirmed                                                                                                                                                                                                                                                                                      |
| <input type="checkbox"/>            | <input checked="" type="checkbox"/> The exact sample size ( $n$ ) for each experimental group/condition, given as a discrete number and unit of measurement                                                                                                                                    |
| <input type="checkbox"/>            | <input checked="" type="checkbox"/> A statement on whether measurements were taken from distinct samples or whether the same sample was measured repeatedly                                                                                                                                    |
| <input type="checkbox"/>            | <input checked="" type="checkbox"/> The statistical test(s) used AND whether they are one- or two-sided<br><i>Only common tests should be described solely by name; describe more complex techniques in the Methods section.</i>                                                               |
| <input checked="" type="checkbox"/> | <input type="checkbox"/> A description of all covariates tested                                                                                                                                                                                                                                |
| <input checked="" type="checkbox"/> | <input type="checkbox"/> A description of any assumptions or corrections, such as tests of normality and adjustment for multiple comparisons                                                                                                                                                   |
| <input type="checkbox"/>            | <input checked="" type="checkbox"/> A full description of the statistical parameters including central tendency (e.g. means) or other basic estimates (e.g. regression coefficient) AND variation (e.g. standard deviation) or associated estimates of uncertainty (e.g. confidence intervals) |
| <input type="checkbox"/>            | <input checked="" type="checkbox"/> For null hypothesis testing, the test statistic (e.g. $F$ , $t$ , $r$ ) with confidence intervals, effect sizes, degrees of freedom and $P$ value noted<br><i>Give <math>P</math> values as exact values whenever suitable.</i>                            |
| <input checked="" type="checkbox"/> | <input type="checkbox"/> For Bayesian analysis, information on the choice of priors and Markov chain Monte Carlo settings                                                                                                                                                                      |
| <input type="checkbox"/>            | <input checked="" type="checkbox"/> For hierarchical and complex designs, identification of the appropriate level for tests and full reporting of outcomes                                                                                                                                     |
| <input checked="" type="checkbox"/> | <input type="checkbox"/> Estimates of effect sizes (e.g. Cohen's $d$ , Pearson's $r$ ), indicating how they were calculated                                                                                                                                                                    |

*Our web collection on [statistics for biologists](#) contains articles on many of the points above.*

### Software and code

Policy information about [availability of computer code](#)

Data collection

Data analysis

For manuscripts utilizing custom algorithms or software that are central to the research but not yet described in published literature, software must be made available to editors and reviewers. We strongly encourage code deposition in a community repository (e.g. GitHub). See the Nature Portfolio [guidelines for submitting code & software](#) for further information.

### Data

Policy information about [availability of data](#)

All manuscripts must include a [data availability statement](#). This statement should provide the following information, where applicable:

- Accession codes, unique identifiers, or web links for publicly available datasets
- A description of any restrictions on data availability
- For clinical datasets or third party data, please ensure that the statement adheres to our [policy](#)

The authors declare that the data supporting the findings of this study are available within the article, source data, and its Supplementary Information. A reporting summary for this article is available as a Supplementary Information file. Source data are provided with this paper.

## Field-specific reporting

Please select the one below that is the best fit for your research. If you are not sure, read the appropriate sections before making your selection.

Life sciences  Behavioural & social sciences  Ecological, evolutionary & environmental sciences

For a reference copy of the document with all sections, see [nature.com/documents/nr-reporting-summary-flat.pdf](https://www.nature.com/documents/nr-reporting-summary-flat.pdf)

## Life sciences study design

All studies must disclose on these points even when the disclosure is negative.

|                 |                                                                                                                                                                                                                                                                                                                                                                                                                                                                                                                                                                                                                                                                                                                                                                                                                                                                                                                                 |
|-----------------|---------------------------------------------------------------------------------------------------------------------------------------------------------------------------------------------------------------------------------------------------------------------------------------------------------------------------------------------------------------------------------------------------------------------------------------------------------------------------------------------------------------------------------------------------------------------------------------------------------------------------------------------------------------------------------------------------------------------------------------------------------------------------------------------------------------------------------------------------------------------------------------------------------------------------------|
| Sample size     | Sample sizes were based on previous experience and publications. We performed sample size calculations on online platform-EDA (Experimental Design Assistant, national centre for the replacement refinement & reduction of animals in research, <a href="https://eda.nc3rs.org.uk/about">https://eda.nc3rs.org.uk/about</a> ). <sup>[1]</sup> Following the instructions of EDA, we finished the experiment design diagram and typed the certain parameters which were based on results from published studies for power analysis. This was determined at a minimum of 5 rats for each group. In general, 6-8 rats or 3-4 samples per group are appropriate for in vivo experiments involving therapeutic efficacy, survival, and flow cytometry.<br>1. Towner RA, et al. Regression of glioma tumor growth in F98 and U87 rat glioma models by the Nitrone OKN-007. <i>Neuro-oncology</i> 15, 330-340 (2013). 330-340 (2013). |
| Data exclusions | No data was excluded.                                                                                                                                                                                                                                                                                                                                                                                                                                                                                                                                                                                                                                                                                                                                                                                                                                                                                                           |
| Replication     | As reported in Methods Section, experiments were all replicated at at least three times (n = 3 rats, mice or cell samples cultured in independent space such as plate or disk), and attempts at replication were successful.                                                                                                                                                                                                                                                                                                                                                                                                                                                                                                                                                                                                                                                                                                    |
| Randomization   | All animals were randomized between groups.                                                                                                                                                                                                                                                                                                                                                                                                                                                                                                                                                                                                                                                                                                                                                                                                                                                                                     |
| Blinding        | Animals were assigned randomly to control and experimental groups. Although experimenters were not blinded to group allocation for data collection, subsequent offline analysis was performed blinded to experimental conditions. The experimenters were blinded to experimental conditions for analysis of immunohistochemistry and in situ hybridization.                                                                                                                                                                                                                                                                                                                                                                                                                                                                                                                                                                     |

## Reporting for specific materials, systems and methods

We require information from authors about some types of materials, experimental systems and methods used in many studies. Here, indicate whether each material, system or method listed is relevant to your study. If you are not sure if a list item applies to your research, read the appropriate section before selecting a response.

### Materials & experimental systems

| n/a                                 | Involved in the study                                           |
|-------------------------------------|-----------------------------------------------------------------|
| <input type="checkbox"/>            | <input checked="" type="checkbox"/> Antibodies                  |
| <input type="checkbox"/>            | <input checked="" type="checkbox"/> Eukaryotic cell lines       |
| <input checked="" type="checkbox"/> | <input type="checkbox"/> Palaeontology and archaeology          |
| <input type="checkbox"/>            | <input checked="" type="checkbox"/> Animals and other organisms |
| <input type="checkbox"/>            | <input checked="" type="checkbox"/> Human research participants |
| <input checked="" type="checkbox"/> | <input type="checkbox"/> Clinical data                          |
| <input checked="" type="checkbox"/> | <input type="checkbox"/> Dual use research of concern           |

### Methods

| n/a                                 | Involved in the study                                      |
|-------------------------------------|------------------------------------------------------------|
| <input checked="" type="checkbox"/> | <input type="checkbox"/> ChIP-seq                          |
| <input type="checkbox"/>            | <input checked="" type="checkbox"/> Flow cytometry         |
| <input type="checkbox"/>            | <input checked="" type="checkbox"/> MRI-based neuroimaging |

## Antibodies

|                 |                                                                                                                                                                                                                                                                                                                                                                                                                                                                                                                                                                                                                                                                                                                                                                                                                                                                                                                                                                                                                                                                                                                                                                                                                                                                                                                                                  |
|-----------------|--------------------------------------------------------------------------------------------------------------------------------------------------------------------------------------------------------------------------------------------------------------------------------------------------------------------------------------------------------------------------------------------------------------------------------------------------------------------------------------------------------------------------------------------------------------------------------------------------------------------------------------------------------------------------------------------------------------------------------------------------------------------------------------------------------------------------------------------------------------------------------------------------------------------------------------------------------------------------------------------------------------------------------------------------------------------------------------------------------------------------------------------------------------------------------------------------------------------------------------------------------------------------------------------------------------------------------------------------|
| Antibodies used | Antibodies: the antibodies used in identifying the stemness of MSC including anti-CD13 (clone WM15, Cat No: 555394), anti-CD29 (clone MAR4, Cat No: 555443), anti-CD44 (clone G44-26, Cat No: 550988), anti-CD73 (clone AD2, Cat No: 550257), anti-CD90 (clone 5E10, Cat No: 559869), anti-CD105 (clone 266, Cat No: 560839), anti-CD166 (clone 3A6, Cat No: 559263), anti-CD49b (clone 12F1, Cat No: 555669), anti-CD1d (clone CD1d42, Cat No: 563505), anti-CD3 (clone SK7, 340542), anti-CD10 (clone HI10a, Cat No: 561002), anti-CD14 (clone M5E2, cat No: 561712), anti-CD31 (clone MEC13.3, cat No: 550274), anti-CD34 (clone 581, cat No: 555824), anti-CD45 (clone HI30, 560975), anti-CD49d (clone 9F10, cat No: 560972), anti-CD56 (clone B159, cat No: 555518), anti-CD117 (clone 104D2, cat No: 340529), anti-HLA-ABC (clone G46-2.6, cat No: 555555), and anti-HLA-DR (clone G46-6, cat No: 560944) were purchased from BD Biosciences and were all diluted at 1:100. For the antibodies used in immunocytochemical assessment including the ones against luciferase (clone21, diluted at 1:200), GFAP (clone GA5, diluted at 1:1000), Tuj-1 (clone TU-20, diluted at 1:1000), or MAP-2 (clone AP20, diluted at 1:300) were purchased from Millipore. Anti-β-Actin (clone mAbcam 8226, diluted at 1:1000) was purchased from Abcam. |
| Validation      | Antibody validation is based on previously published data.<br>anti-CD13 (clone WM15, Cat No: 555394), <a href="https://www.bdbiosciences.com/en-us/products/reagents/flow-cytometry-reagents/research-reagents/single-color-antibodies-ruo/pe-mouse-anti-human-cd13.555394">https://www.bdbiosciences.com/en-us/products/reagents/flow-cytometry-reagents/research-reagents/single-color-antibodies-ruo/pe-mouse-anti-human-cd13.555394</a>                                                                                                                                                                                                                                                                                                                                                                                                                                                                                                                                                                                                                                                                                                                                                                                                                                                                                                      |

anti-CD29 (clone MAR4, Cat No: 555443), <https://wwwbdbiosciences.com/en-sg/products/reagents/flow-cytometry-reagents/research-reagents/single-color-antibodies-ruo/pe-mouse-anti-human-cd29.555443>

anti-CD44 (clone G44-26, Cat No: 550988), <https://wwwbdbiosciences.com/en-us/products/reagents/flow-cytometry-reagents/research-reagents/single-color-antibodies-ruo/purified-mouse-anti-human-cd44.550988>

anti-CD73 (1:100, clone AD2, Cat No: 550257), <https://wwwbdbiosciences.com/en-us/products/reagents/flow-cytometry-reagents/research-reagents/single-color-antibodies-ruo/pe-mouse-anti-human-cd73.550257>

anti-CD90 (1:100, clone 5E10, Cat No: 559869), <https://wwwbdbiosciences.com/en-us/products/reagents/flow-cytometry-reagents/research-reagents/single-color-antibodies-ruo/apc-mouse-anti-human-cd90.559869>

anti-CD105 (1:100, clone 266, Cat No: 560839), <https://wwwbdbiosciences.com/en-us/products/reagents/flow-cytometry-reagents/research-reagents/single-color-antibodies-ruo/pe-mouse-anti-human-cd105.560839>

anti-CD166 (1:100, clone 3A6, Cat No: 559263), <https://wwwbdbiosciences.com/en-us/products/reagents/flow-cytometry-reagents/research-reagents/single-color-antibodies-ruo/pe-mouse-anti-human-cd166.559263>

anti-CD49b (1:100, clone 12F1, Cat No: 555669), <https://wwwbdbiosciences.com/en-au/products/reagents/flow-cytometry-reagents/research-reagents/single-color-antibodies-ruo/pe-mouse-anti-human-cd49b.555669>

anti-CD1d(1:100, clone CD1d42, Cat No: 563505), <https://wwwbdbiosciences.com/en-us/products/reagents/flow-cytometry-reagents/research-reagents/single-color-antibodies-ruo/apc-mouse-anti-human-cd1d.563505>

anti-CD3 (1:100, clone SK7, Cat No: 340542), <https://wwwbdbiosciences.com/en-nz/products/reagents/flow-cytometry-reagents/clinical-diagnostics/single-color-antibodies-asr-ivd-ce-ivd/cd3-fitc.340542>

anti-CD10 (clone HI10a, Cat No: 561002), <https://wwwbdbiosciences.com/en-us/products/reagents/flow-cytometry-reagents/research-reagents/single-color-antibodies-ruo/pe-mouse-anti-human-cd10.561002>

anti-CD14 (clone M5E2, cat No: 561712), <https://wwwbdbiosciences.com/en-nz/products/reagents/flow-cytometry-reagents/research-reagents/single-color-antibodies-ruo/fitc-mouse-anti-human-cd14.561712>

anti-CD31 (clone MEC13.3, cat No: 557508), <https://wwwbdbiosciences.com/en-au/products/reagents/flow-cytometry-reagents/research-reagents/single-color-antibodies-ruo/fitc-mouse-anti-human-cd31.557508>

anti-CD34 (clone 581, cat No: 555824), <https://wwwbdbiosciences.com/en-us/products/reagents/flow-cytometry-reagents/research-reagents/single-color-antibodies-ruo/apc-mouse-anti-human-cd34.555824>

anti-CD45 (clone HI30, 560975), <https://wwwbdbiosciences.com/en-us/products/reagents/flow-cytometry-reagents/research-reagents/single-color-antibodies-ruo/pe-mouse-anti-human-cd45.560975>

anti-CD49d (clone 9F10, cat No: 560972), <https://wwwbdbiosciences.com/en-ca/products/reagents/flow-cytometry-reagents/research-reagents/single-color-antibodies-ruo/pe-mouse-anti-human-cd49d.560972>

anti-CD56 (clone B159, cat No: 555518), <https://wwwbdbiosciences.com/en-us/products/reagents/flow-cytometry-reagents/research-reagents/single-color-antibodies-ruo/apc-mouse-anti-human-cd56-ncam-1.555518>

anti-CD117 (clone 104D2, cat No: 340529), <https://wwwbdbiosciences.com/en-au/products/reagents/flow-cytometry-reagents/clinical-discovery-research/single-color-antibodies-ruo-gmp/pe-mouse-anti-human-cd117.340529>

anti-HLA-ABC (clone G46-2.6, cat No: 555555), <https://wwwbdbiosciences.com/en-us/products/reagents/flow-cytometry-reagents/research-reagents/single-color-antibodies-ruo/apc-mouse-anti-human-hla-abc.555555>

anti-HLA-DR (clone G46-6, cat No: 560944), <https://wwwbdbiosciences.com/en-us/products/reagents/flow-cytometry-reagents/research-reagents/single-color-antibodies-ruo/fitc-mouse-anti-human-hla-dr.560944>

anti-luciferase (clone21, Millipore), [https://www.merckmillipore.com/TW/zh/product/Anti-Luciferase-Antibody-clone21,MM\\_NF-05-603](https://www.merckmillipore.com/TW/zh/product/Anti-Luciferase-Antibody-clone21,MM_NF-05-603)

anti-GFAP (clone GA5, Millipore), [https://www.merckmillipore.com/TW/zh/product/Anti-Glial-Fibrillary-Acidic-Protein-Antibody-clone-GA5,MM\\_NF-MAB3402](https://www.merckmillipore.com/TW/zh/product/Anti-Glial-Fibrillary-Acidic-Protein-Antibody-clone-GA5,MM_NF-MAB3402)

anti-Tuj-1 (clone TU-20, Millipore), [https://www.merckmillipore.com/TW/zh/product/Anti-Tubulin-Antibody-beta-III-isoform-CT-clone-TU-20-Similar-to-TUJ1,MM\\_NF-MAB1637](https://www.merckmillipore.com/TW/zh/product/Anti-Tubulin-Antibody-beta-III-isoform-CT-clone-TU-20-Similar-to-TUJ1,MM_NF-MAB1637)

anti-MAP-2 (clone AP20, Millipore), [https://www.merckmillipore.com/TW/zh/product/Anti-MAP2-Antibody-clone-AP20,MM\\_NF-MAB3418](https://www.merckmillipore.com/TW/zh/product/Anti-MAP2-Antibody-clone-AP20,MM_NF-MAB3418)

anti- $\beta$ -Actin (clone mAbcam 8226, Abcam), <https://www.abcam.com/beta-actin-antibody-mabcam-8226-loading-control-ab8226.html>

Validation of the antibodies was according to the website of manufacturing company or was achieved using flow cytometry and IHC staining.

## Eukaryotic cell lines

Policy information about [cell lines](#)

|                                                                   |                                                                                                                                                                                                                                            |
|-------------------------------------------------------------------|--------------------------------------------------------------------------------------------------------------------------------------------------------------------------------------------------------------------------------------------|
| Cell line source(s)                                               | F98 (ATCC® CRL-2397™), GBM 8401(BCRC Number: 60163), 4T1(ATCC® CRL-2539™), UMSCs (The collected human umbilical cord tissues approved by the Institutional Review Board (IRB) of the China Medical University Hospital in Taichung (ROC)). |
| Authentication                                                    | The cell lines were authenticated by the supplier using morphology, karyotyping, and PCR-based approaches.                                                                                                                                 |
| Mycoplasma contamination                                          | We did not detect contamination of the cells using Hoechst DNA stain method and agar culture method.                                                                                                                                       |
| Commonly misidentified lines (See <a href="#">ICLAC</a> register) | Not any misidentified line is used in this study.                                                                                                                                                                                          |

## Animals and other organisms

Policy information about [studies involving animals](#); [ARRIVE guidelines](#) recommended for reporting animal research

|                    |                                                                                                                                                                                                       |
|--------------------|-------------------------------------------------------------------------------------------------------------------------------------------------------------------------------------------------------|
| Laboratory animals | The female rats strain F344/NNarl (RMRC21002) aged 8 weeks and the male mice strain C57BL/6JNarl (RMRC11005) aged 8 weeks both were purchased from National Laboratory Animal Center, Taipei, Taiwan. |
|--------------------|-------------------------------------------------------------------------------------------------------------------------------------------------------------------------------------------------------|

|                         |                                                                                                                                                                                                                                       |
|-------------------------|---------------------------------------------------------------------------------------------------------------------------------------------------------------------------------------------------------------------------------------|
|                         | Housing condition: temperature:23±2°C; humidity: 50±10%; dark/light cycle: 12hour/12hour.                                                                                                                                             |
| Wild animals            | Not any wild animal was used in this study.                                                                                                                                                                                           |
| Field-collected samples | The study did not involve samples collected from the field.                                                                                                                                                                           |
| Ethics oversight        | National Animal Center of Taiwan, Ministry of Science and Technology (ROC), and Institutional Committee of Animal Research of China Medical University approved the animal experiments in this study under IACUC number CMU 2020-014. |

Note that full information on the approval of the study protocol must also be provided in the manuscript.

## Human research participants

Policy information about [studies involving human research participants](#)

|                            |                                                                                                                                                                                                                                                                                                                                                                                                                                                                                                                                                                                                                                                                                                                                                                                                                                                              |
|----------------------------|--------------------------------------------------------------------------------------------------------------------------------------------------------------------------------------------------------------------------------------------------------------------------------------------------------------------------------------------------------------------------------------------------------------------------------------------------------------------------------------------------------------------------------------------------------------------------------------------------------------------------------------------------------------------------------------------------------------------------------------------------------------------------------------------------------------------------------------------------------------|
| Population characteristics | To collect umbilical cord mesenchymal stem cells, 30 pregnant women were designed to be included in the studies for the placenta donation. The inclusion criteria were (1) 34 weeks or longer pregnant with intact placenta, (2) free of complications of pregnancy, and (3) healthy pregnant women and fetus. The exclusion criteria were (1) with critical illness such as diabetes, immune-related diseases, or cancers, (2) asymptomatic hepatitis A,B or C carriers and syphilis patients, (3) being evaluated as an improper case by the doctor, (4) having or have even been diagnosed with pulmonary tuberculosis, and (5) tested positive with treponema pallidum, Chlamydia trachomatis, human T cell leukemia virus, West Nile Virus or Neisseria gonorrhoea within 8 weeks prior to giving birth, and (6) ever being diagnosed with Zika or HIV. |
| Recruitment                | Written informed consent was acquired from the pregnant women. The pregnant women who agree to donate the placenta and match the above characteristic were approached and recruited into the studies without any additional bias.                                                                                                                                                                                                                                                                                                                                                                                                                                                                                                                                                                                                                            |
| Ethics oversight           | IRB: #CMUH-110-REC-1-068                                                                                                                                                                                                                                                                                                                                                                                                                                                                                                                                                                                                                                                                                                                                                                                                                                     |

Note that full information on the approval of the study protocol must also be provided in the manuscript.

## Flow Cytometry

### Plots

Confirm that:

- The axis labels state the marker and fluorochrome used (e.g. CD4-FITC).
- The axis scales are clearly visible. Include numbers along axes only for bottom left plot of group (a 'group' is an analysis of identical markers).
- All plots are contour plots with outliers or pseudocolor plots.
- A numerical value for number of cells or percentage (with statistics) is provided.

### Methodology

|                           |                                                                                                                                                                                                                                                                                                                                                                                                                                                                                                                                                                                                                                                                                                                                                                                                                                                                                                                                                         |
|---------------------------|---------------------------------------------------------------------------------------------------------------------------------------------------------------------------------------------------------------------------------------------------------------------------------------------------------------------------------------------------------------------------------------------------------------------------------------------------------------------------------------------------------------------------------------------------------------------------------------------------------------------------------------------------------------------------------------------------------------------------------------------------------------------------------------------------------------------------------------------------------------------------------------------------------------------------------------------------------|
| Sample preparation        | Sample preparation was described at the "Method" part in manuscript.                                                                                                                                                                                                                                                                                                                                                                                                                                                                                                                                                                                                                                                                                                                                                                                                                                                                                    |
| Instrument                | BD FACSCanto II (#338962 FACSCanto Flow Cytometer)                                                                                                                                                                                                                                                                                                                                                                                                                                                                                                                                                                                                                                                                                                                                                                                                                                                                                                      |
| Software                  | FACSDiva software v9.3.2                                                                                                                                                                                                                                                                                                                                                                                                                                                                                                                                                                                                                                                                                                                                                                                                                                                                                                                                |
| Cell population abundance | The umbilical cord explants were cultured in DMEM containing 10% fetal calf serum (FCS, Gibco) and antibiotics at 37 °C in a 95% air/5% CO2 humidified atmosphere. They were left undisturbed for 5–7 days to allow for migration of the cells from the explants. The cellular morphology of umbilical cord-derived mesenchymal stem cells (UMSCs) became homogeneously spindle shaped in cultures after 4–8 passages as shown in Figure S4, and the specific surface molecules of cells from the WJ were characterized by flow cytometric analysis. The cells were detached with 2 mM EDTA in PBS, washed with PBS containing 2% BSA and 0.1% sodium azide (Sigma, USA) and incubated with the respective antibody conjugated with fluorescein isothiocyanate (FITC) or phycoerythrin (PE) including CD13, CD29,CD44,CD73,CD90, CD105,CD166, CD49b, CD1d, CD3, CD10, CD14, CD31, CD34, CD45, CD49d, CD56, CD117, HLA-ABC, and HLA-DR (BD, PharMingen). |
| Gating strategy           | The gating strategies was performed based on the justification of first gate, exclusion of doublets by FSC-A and FSC-H, exclusion of dead cells by selection of 7-AAD-/CD90+                                                                                                                                                                                                                                                                                                                                                                                                                                                                                                                                                                                                                                                                                                                                                                            |

Tick this box to confirm that a figure exemplifying the gating strategy is provided in the Supplementary Information.

## Magnetic resonance imaging

### Experimental design

|                       |                                                                                                                                                                                          |
|-----------------------|------------------------------------------------------------------------------------------------------------------------------------------------------------------------------------------|
| Design type           | To evaluate the targeting ability and accumulation of SNS in GBM via the signal from gadodiamide and nano iron in Gd-PPFNP (In vivo). To evaluate the imaging ability of SNS (In vitro). |
| Design specifications | After injection of different groups as figure 4 listed, MRI was performed on F344 rats under anesthesia in a 3-Tesla (3-T)                                                               |

MRI scanner (GE) at various time points (12 h, 24 h, and 48 h) after cells transplantation on animals under anesthesia in 3-Tesla (GE) MRI scanner. For each rat, we acquired 22 coronal and axial images with 0.7 mm thick slices. MSC cells were seeded in 6-well culture plates. The cells were added with different Gd concentrations (10, 1, 0.1, 0.01ug/ml) with or without nanoparticles and were then dispersed in 2% agarose. The images were performed using a 7-Tesla (7-T) PharmaScan (Bruker).

Behavioral performance measures

No behavioural performance was measured.

## Acquisition

Imaging type(s)

T1-weighted and T2-weighted imaging for the cross sections of the rat brain.

Field strength

3-Tesla (In vivo). 7-Tesla (In vitro).

Sequence &amp; imaging parameters

In vivo:

For spin-echo (SE) T1-weighted imaging (T1WI), the images were acquired with repetition time/echo time (TR/TE) of 500/15 ms, field of view (FOV) of 28×44 mm. Rapid Acquisition with Relaxation Enhancement (RARE) spin echo sequence was used for fast T2-weighted imaging (T2WI, TE 50ms, TR 3000ms) with a 256×256 in-plane matrix and a 2.56cm field of view (FOV).

In vitro:

T1-weighted images were obtained by T1-FLASH sequences as follows: TE=9 ms, TR= 500 ms, matrix size=256\*256 and NEX=16. T2-weighted images were obtained by T2 RARE sequences as follows: TE=19 ms, TR=3000 ms, matrix size=256\*256 and NEX=1.

Area of acquisition

Whole brain.

Diffusion MRI

 Used Not used

## Preprocessing

Preprocessing software

No preprocessing was used.

Normalization

No normalization was used.

Normalization template

No template was used.

Noise and artifact removal

No noise removal or artifact removal were used

Volume censoring

No volume censoring was used.

## Statistical modeling & inference

Model type and settings

No statistical modeling was used.

Effect(s) tested

No statistical effects were tested.

Specify type of analysis:

 Whole brain  ROI-based  BothStatistic type for inference  
(See [Eklund et al. 2016](#))

None used.

Correction

None needed.

## Models & analysis

n/a | Involved in the study

  Functional and/or effective connectivity  Graph analysis  Multivariate modeling or predictive analysis
